# Supplementary material for: Stepwise pillar insertion into metal–organic frameworks: a sequential self-assembly approach
Source: Royal Society of Chemistry journal article supplement (doi:10.1039/c2ce25545f), 2012-01-01
Supplement: c2ce25545f_2.pdf [file c2ce25545f_2.pdf]

Supporting Information for

# **Stepwise Pillar Insertion into Metal-Organic Frameworks: A Sequential–Assembly Approach**

*Brandon J. Burnett<sup>a</sup> and Wonyoung Choe<sup>a,b,\*</sup>*

<sup>a</sup> Department of Chemistry, University of Nebraska-Lincoln, Lincoln, Nebraska, 685188-0304, United States, <sup>b</sup> School of Nano-Bioscience and Chemical Engineering, Ulsan National Institute of Science and Technology (UNIST), 50 UNIST Road, Ulsan 689-798, Korea

\*To whom correspondence should be addressed. E-mail: chem571@gmail.com

## 1. Experimental

### 1.1 General Considerations

**Materials.** 5,10,15,20-tetrakis(4-carboxyphenyl)-21*H*,23*H*-porphyrin (TCPP) (Frontier Scientific), Zn(NO<sub>3</sub>)<sub>2</sub>·6H<sub>2</sub>O (Sigma-Aldrich), Pyrazine (Sigma-Aldrich), 4,4'-bipyridine (BPY) (Sigma-Aldrich), 3,6-di-(4-pyridyl)-1,2,4,5-tetrazine (DPT) (TCI America), and *N,N*-diethylformamide (DEF) (TCI America) were all obtained from commercial sources and used without further purification. *N,N'*-di-(4-pyridyl)-1,4,5,8-naphthalenetetracarboxydiimide (DPNI) was synthesized according to published procedure.<sup>1</sup>

**Instrumentation.** X-ray diffraction data were taken using a spinning capillary method<sup>2</sup> with a Bruker AXS DA x-ray diffractometer with a GADDS area detector and a conventional copper target x-ray tube set to 40 KV and 40 mA. The resulting patterns were compared to the simulated patterns obtained by Mercury.<sup>3</sup> Thermogravimetric Analysis (TGA) was performed on a Perkin Elmer STA 6000 Thermogravimetric Analyzer, heated from 25°C to 600°C at a rate of 5°C/minute under N<sub>2</sub> atmosphere. <sup>1</sup>H NMR was performed on a Bruker FT-NMR spectrometer (300 MHz).

**1.2 Syntheses.** For all structures, TGA and Elemental Analysis revealed the amount of solvent in the crystals and were taken into account to calculate the yield.

**PPF-1[Zn<sub>2</sub>(ZnTCPP)].** TCPP (55.3 mg, 0.07 mmol), Zn(NO<sub>3</sub>)<sub>2</sub>·6H<sub>2</sub>O (62.3 mg, 0.21 mmol), and pyrazine (11.2 mg, 0.14 mmol) were added to a mixture of DEF (10.5 mL) and ethanol (3.5 mL) in a capped pressure vessel, sonicated to mix, and heated to 80°C for 24 h, followed by slow cooling to room temperature over 9 h. Yield: 73.3 mg (71% based on porphyrin). Anal. Calcd. for [C<sub>48</sub>H<sub>24</sub>N<sub>4</sub>O<sub>8</sub>Zn<sub>3</sub>] 3.3 DEF · 1.5 H<sub>2</sub>O · ethanol · 0.4 pyrazine: C, 57.7; H, 5.0; N, 8.9%. Found: C, 57.8; H, 5.0; N, 9.0%.

**PPF-27 [Zn<sub>2</sub>(ZnTCPP)(BPY)] from PPF-1.** Filtered PPF-1 (44.1 mg, 0.03 mmol) and BPY (3.2 mg, 0.02 mmol) were added to a mixture of DEF (4.5 mL) and ethanol (1.5 mL) in a capped vial, swirled by hand to mix, and left to react at room temperature for ~ 2 hr. Yield: 45.1 mg (95%). Anal. Calcd. for [C<sub>58</sub>H<sub>32</sub>N<sub>6</sub>O<sub>8</sub>Zn<sub>3</sub>] 3DEF · 2 H<sub>2</sub>O · 1 ethanol · 0.2 BPY: C, 59.5; H, 5.0; N, 9.0%. Found: C, 59.4; H, 5.0; N, 9.0%.

**PPF-18 [Zn<sub>2</sub>(ZnTCPP)(DPNI)] from PPF-1.** Filtered PPF-1 (14.7 mg, 0.01 mmol) and DPNI (8.5 mg, 0.02 mmol) were added to a mixture of DEF (1.5 mL) and ethanol (0.5 mL) in a capped vial, swirled by hand to mix, and left to react at room temperature for ~ 2 hr. Yield: 21.2 mg (86%). Anal. Calcd. for [C<sub>72</sub>H<sub>36</sub>N<sub>8</sub>O<sub>12</sub>Zn<sub>3</sub>] 3.6 DEF · 0.5 H<sub>2</sub>O · 3.0 ethanol · 0.2 pyrazine: C, 59.0; H, 4.9; N, 9.0%. Found: C, 59.0; H, 4.9; N, 9.0%.

**PPF-21 [Zn<sub>2</sub>(ZnTCPP)(DPT)] from PPF-1.** Filtered PPF-1 (14.7 mg, 0.01 mmol) and DPT (4.6 mg, 0.02 mmol) were added to a mixture of DEF (1.5 mL) and ethanol (0.5 mL) in a

capped vial, swirled by hand to mix, and left to react at room temperature for ~2 hr. Yield: 16.8 mg (89%). Anal. Calcd. for  $[C_{60}H_{32}N_{10}O_8Zn_3] \cdot 1.7 \text{ DEF} \cdot 2.8 \text{ ethanol}$ : C, 58.6; H, 4.49; N, 10.8%. Found: C, 58.8; H, 4.52; N, 10.7%.

**PPF-4  $[Zn_2(ZnTCPP)(BPY)_{1.5}]$  from PPF-27.** Filtered PPF-27 (15.8 mg, 0.01 mmol) and BPY (8.0 mg, 0.05 mmol) were added to a mixture of DEF (1.5 mL) and ethanol (0.5 mL) in a capped vial, swirled by hand to mix, and left to react at room temperature for ~2 hr. Yield: 15.0 mg (92%). Anal. Calcd. for  $[C_{63}H_{36}N_7O_8Zn_3] \cdot 3.3 \text{ DEF} \cdot 1.5 \text{ H}_2\text{O} \cdot 1 \text{ ethanol}$ : C, 60.3; H, 5.1; N, 8.9%. Found: C, 61.0; H, 5.4; N, 8.9%.

**PPF-4 from PPF-1.** Filtered PPF-1 (14.7 mg, 0.01 mmol) and BPY (8.0 mg, 0.05 mmol) were added to a mixture of DEF (1.5 mL) and ethanol (0.5 mL) in a capped vial, swirled by hand to mix, and left to react at room temperature for ~2 hr. Purity of PPF-4 was confirmed by PXRD.

**PPF-27 from PPF-18.** Filtered PPF-18 (24.5 mg, 0.01 mmol) and BPY (3.2 mg, 0.02 mmol) were added to a mixture of DEF (1.5 mL) and ethanol (0.5 mL) in a capped vial, swirled by hand to mix, and left to react at room temperature for ~2 hr. Purity of PPF-27 was confirmed by PXRD.

**PPF-27 from PPF-21.** Filtered PPF-21 (18.9 mg, 0.01 mmol) and BPY (3.2 mg, 0.02 mmol) were added to a mixture of DEF (1.5 mL) and ethanol (0.5 mL) in a capped vial, swirled by hand to mix, and left to react at room temperature for ~2 hr. Purity of PPF-27 was confirmed by PXRD.

## 2. Structure Analysis

### 2.1 Analysis of PPF-1

PPF-1 is synthesized using pyrazine as a directing agent, aiding in the AB stacking pattern observed by powder and single crystal X-ray diffraction spectrum. Without pyrazine in the experimental procedure, a different phase is observed in the powder X-ray diffraction spectrum. Thus it is believed that pyrazine is needed for the construction of the AB stacked PPF-1 structure. Pyrazine, however was not observed in the single crystal structure and elemental analysis indicates only 0.4 pyrazine molecules per unit cell indicating it being a guest molecule instead of a coordinated linker. To quantitatively find how much pyrazine was in PPF-1 structure, we digested samples of PPF-1 in acid according to the method reported by Cohen.<sup>4</sup> Approximately 5 mg of PPF-1 crystals were filtered, washed  $\geq 3$  times with 5 mL of DMF to rid the crystals of any free (unbound) ligands, and dried under vacuum at 90°C overnight. The dried crystals were then digested with sonication in 500  $\mu\text{L}$  of dilute DCI (10  $\mu\text{L}$  of 35% DCI in  $\text{D}_2\text{O}$  diluted with 500  $\mu\text{L}$  of  $\text{DMSO-}d_6$ ).  $^1\text{H}$  NMR spectra was obtained from the resulting solution (Figure S3). Analysis of the integration of porphyrin signals to pyrazine signals indicate a porphyrin to pyrazine ratio of 1:0.3 which supports the conclusion that pyrazine is a guest and not a coordinated linker which would yield a porphyrin to pyrazine ratio of 1:1.

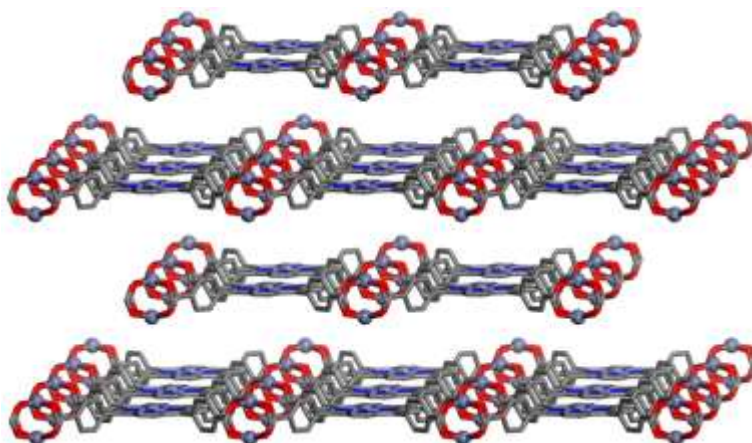

**Figure S1.** Representation of single crystal of PPF-1.

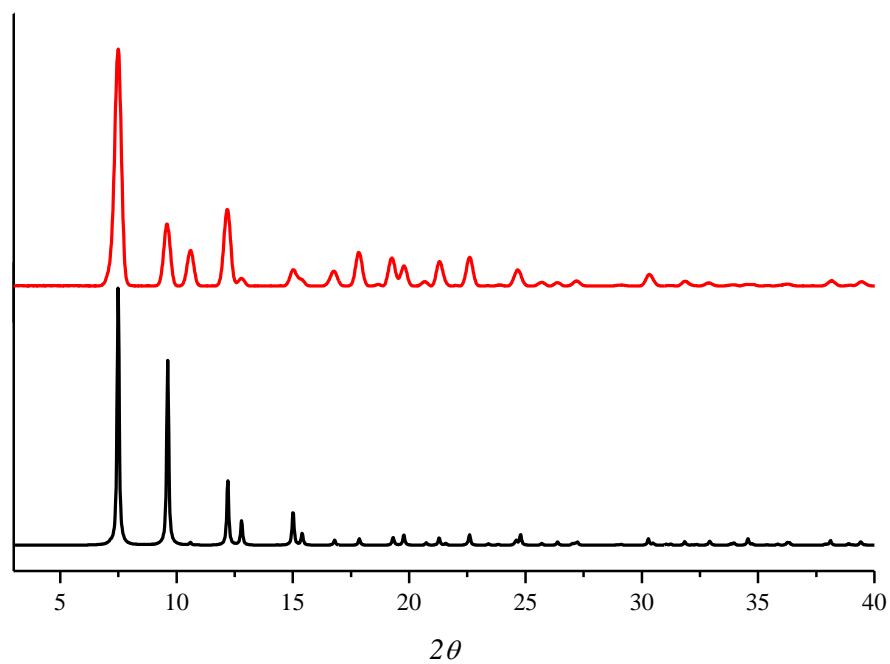

**Figure S2.** The simulated (black) and as synthesized (red) X-ray powder diffraction patterns for PPF-1.

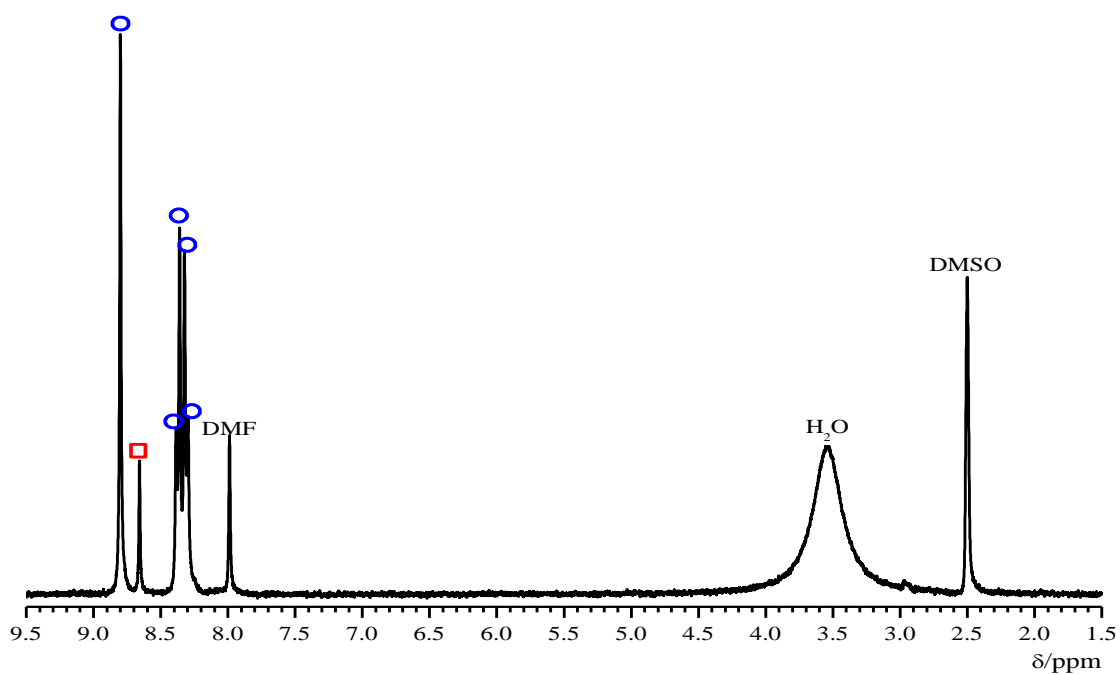

**Figure S3.**  $^1\text{H}$  NMR spectra of digested PPF-1. Red squares and blue circles represent signals of pyrazine and ZnTCPP respectively.

## 2.2 Analysis of PPF-27 synthesized from PPF-1

Powder X-ray diffraction shows full conversion from PPF-1 to PPF-27 and no other products formed (Figure S5). To quantitatively find the occupation of BPY linker in PPF-27, we digested samples of PPF-27 in acid following the same method described above. Analysis of the  $^1\text{H}$  NMR spectra shows 93% occupation of BPY linker in PPF-27 (Figure S6).

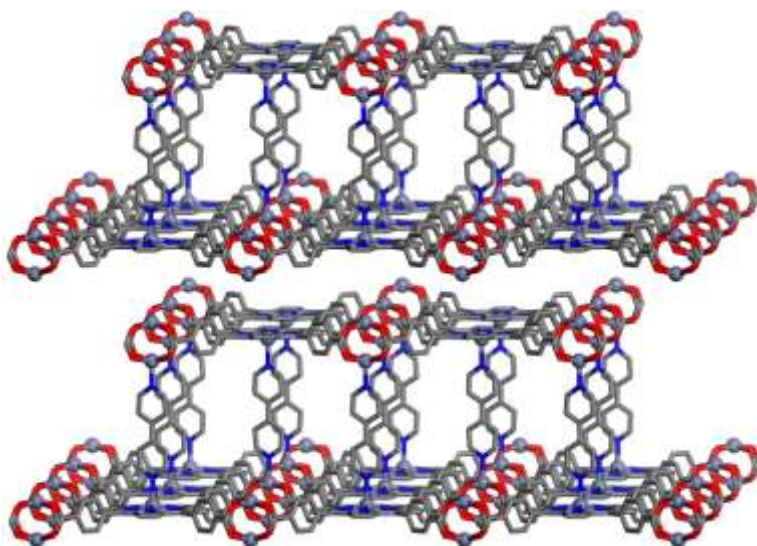

**Figure S4.** Representation of single crystal structure of PPF-27.

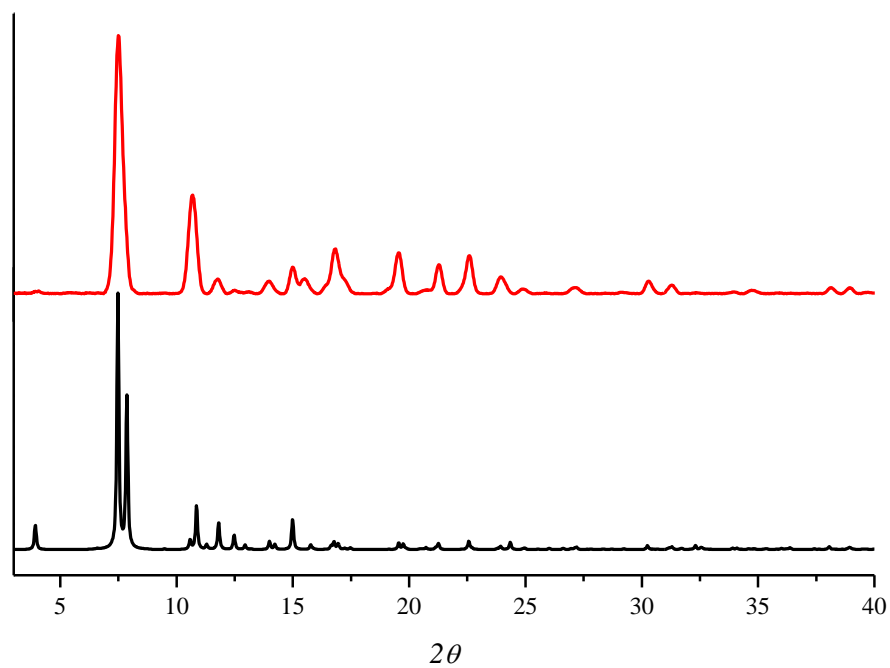

**Figure S5.** The simulated (black) and as synthesized (red) X-ray powder diffraction patterns for PPF-27.



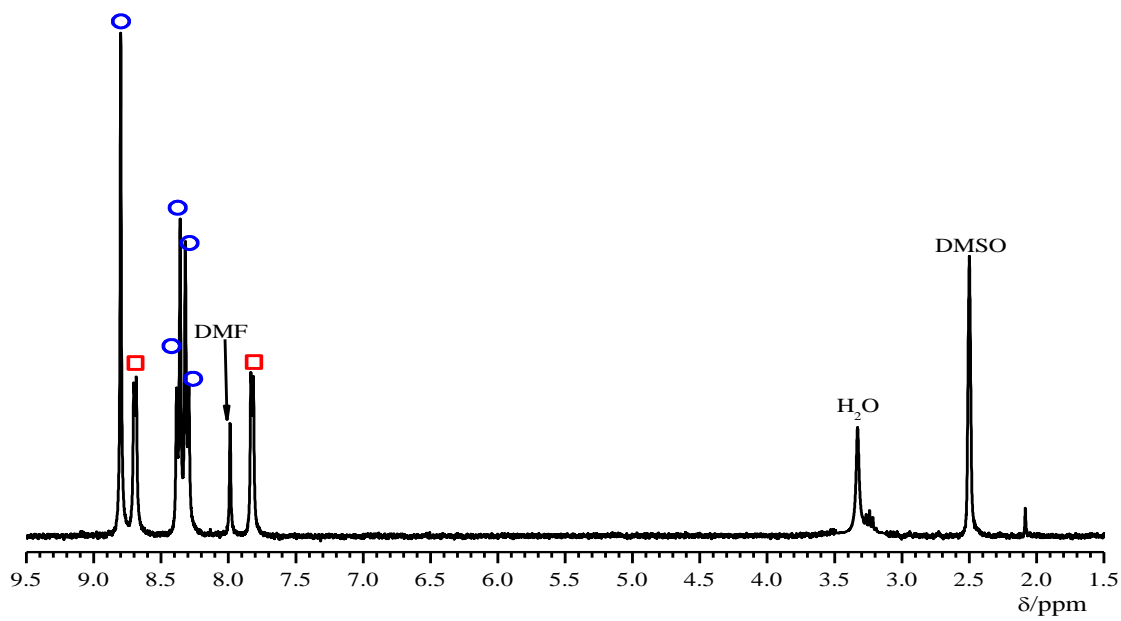

**Figure S6.** <sup>1</sup>H NMR spectra of digested PPF-27. Red squares and blue circles represent signals of BPY and ZnTCPP respectively.

### 2.3 Analysis of PPF-18 synthesized from PPF-1

Powder X-ray diffraction shows full conversion from PPF-1 to PPF-18 and no other products formed (Figure S8). To quantitatively find the occupation of DPNI linker in PPF-18, we digested samples of PPF-18 in acid following the same method described above. Analysis of the  $^1\text{H}$  NMR spectra shows 89% occupation of DPNI linker in PPF-18 (Figure S9).

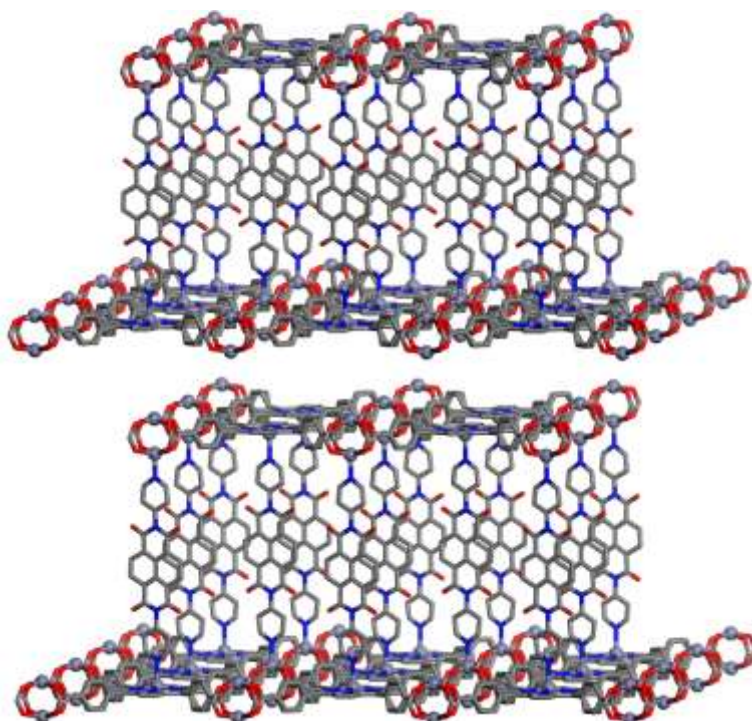

**Figure S7.** Representation of single crystal structure of PPF-18.

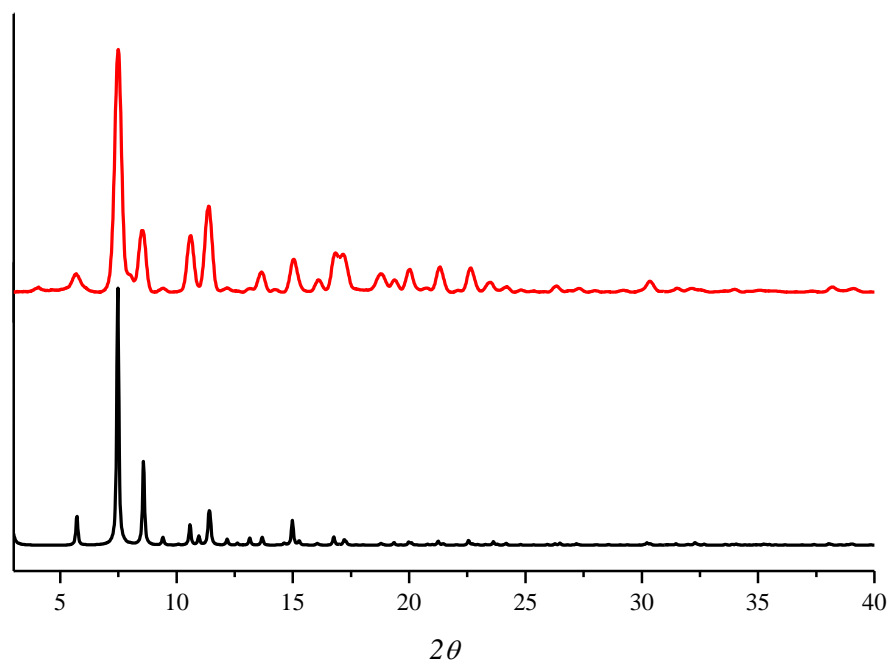

**Figure S8.** The simulated (black) and as synthesized (red) X-ray powder diffraction patterns for PPF-18.

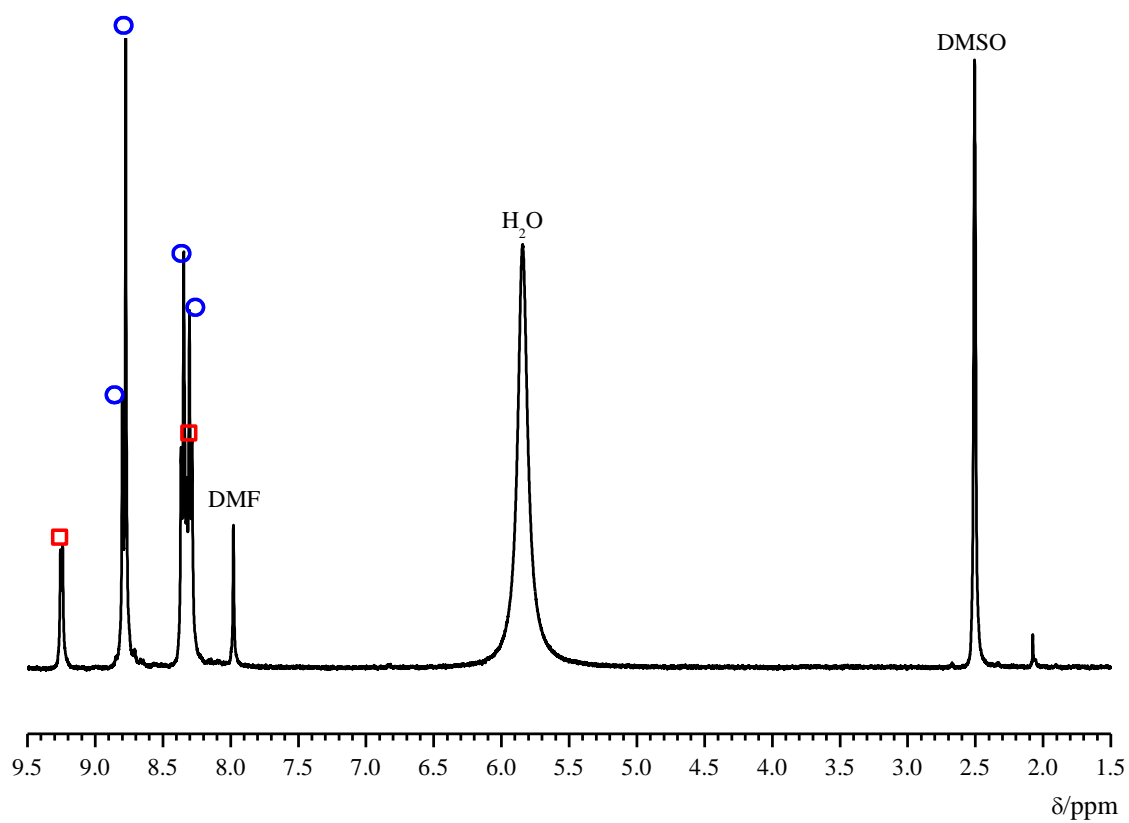

**Figure S9.** <sup>1</sup>H NMR spectra of digested PPF-18. Red squares and blue circles represent signals of DPNI and ZnTCPP respectively.

## 2.4 Analysis of PPF-21 synthesized from PPF-1

Powder X-ray diffraction shows full conversion from PPF-1 to PPF-21 and no other products formed (Figure S11). To quantitatively find the occupation of DPT linker in PPF-21, we digested samples of PPF-21 in acid following the same method described above. Analysis of the  $^1\text{H}$  NMR spectra shows 87% occupation of DPT linker in PPF-21 (Figure S12).

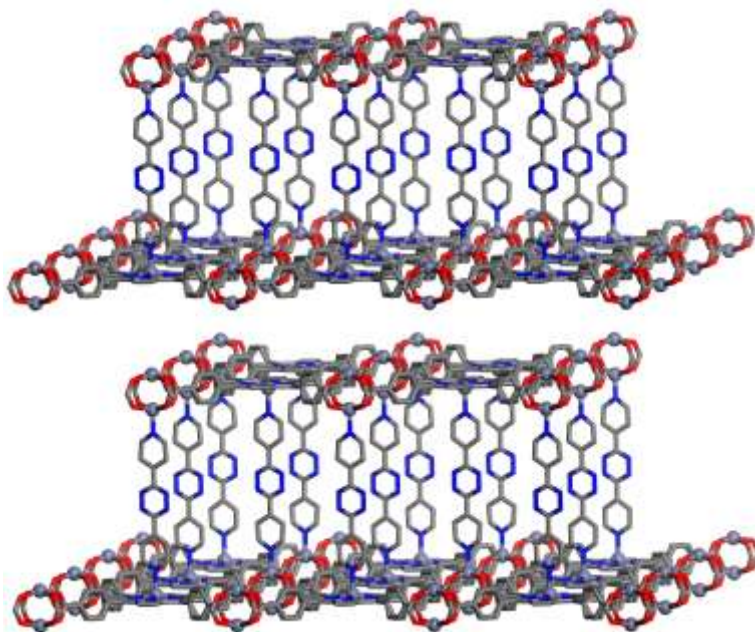

**Figure S10.** Representation of single crystal structure of PPF-21.

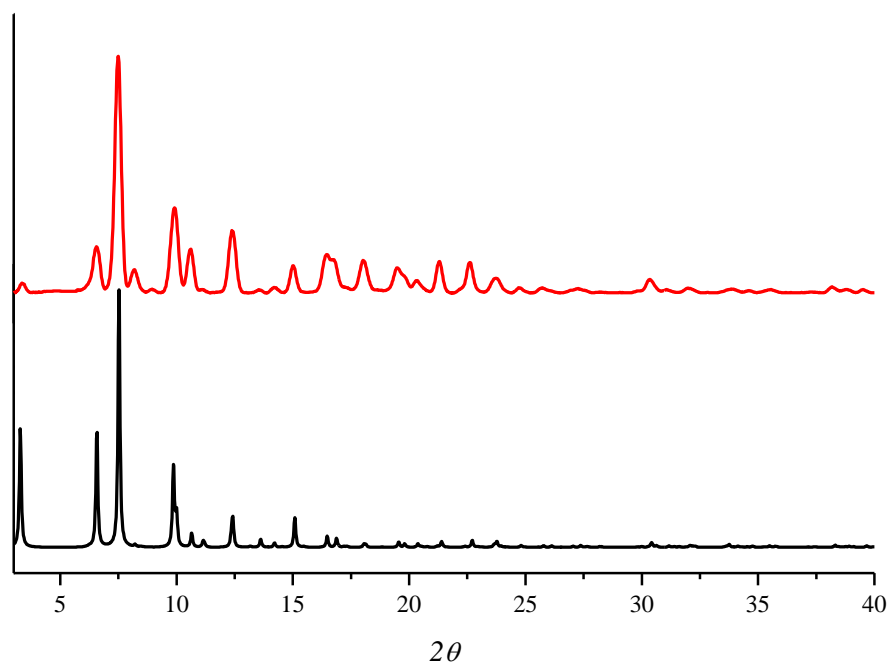

**Figure S11.** The simulated (black) and as synthesized (red) X-ray powder diffraction patterns for PPF-21.

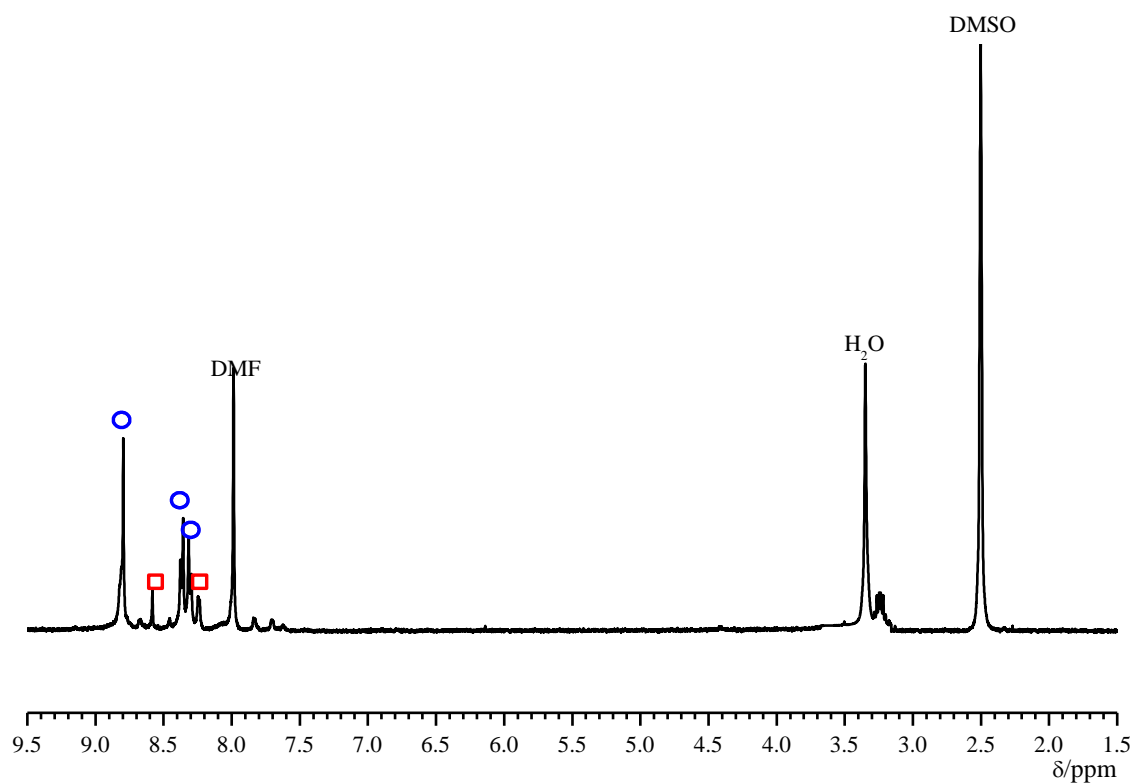

**Figure S12.**  $^1\text{H}$  NMR spectra of digested PPF-21. Red squares and blue circles represent signals of DPT and ZnTCPP respectively.

## 2.5 Analysis of PPF-4 synthesized from PPF-27

Powder X-ray diffraction shows full conversion from PPF-27 to PPF-4 and no other products formed (Figure S14). To quantitatively find the occupation of BPY linker in PPF-4, we digested samples of PPF-4 in acid following the same method described above. Analysis of the  $^1\text{H}$  NMR spectra shows 95% occupation of BPY linker in PPF-4 (Figure S15).

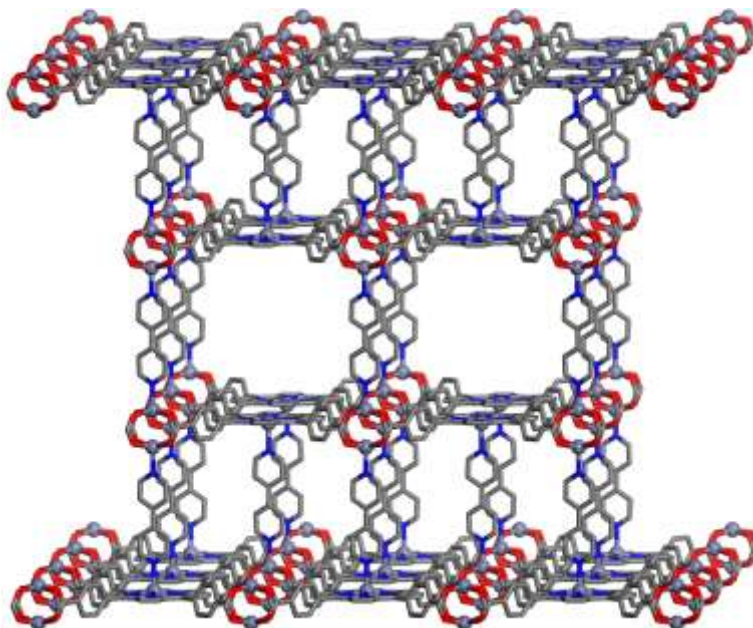

**Figure S13.** Representation of single crystal structure of PPF-4.



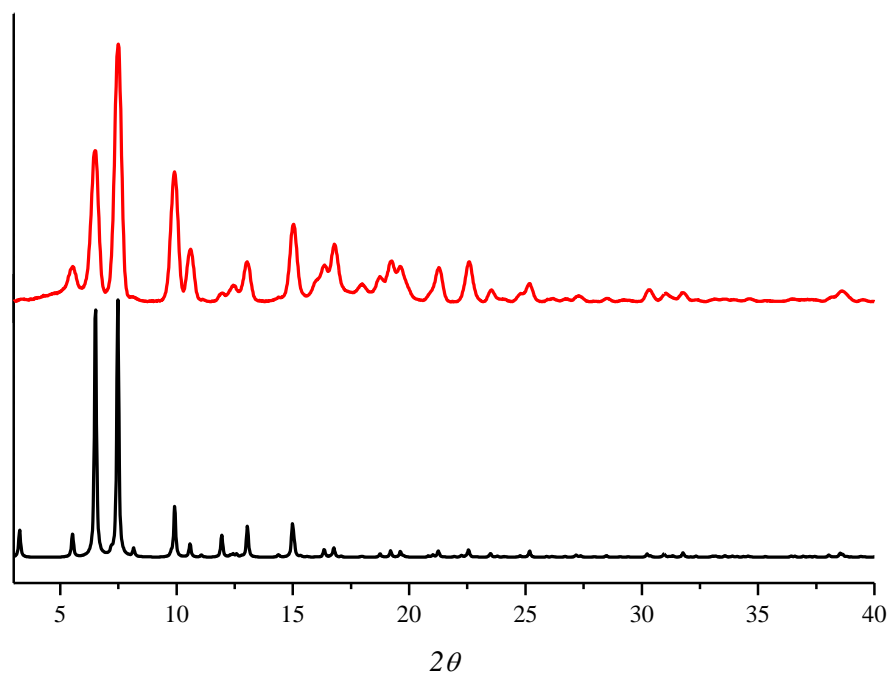

**Figure S14.** The simulated (black) and as synthesized (red) X-ray powder diffraction patterns for PPF-4.

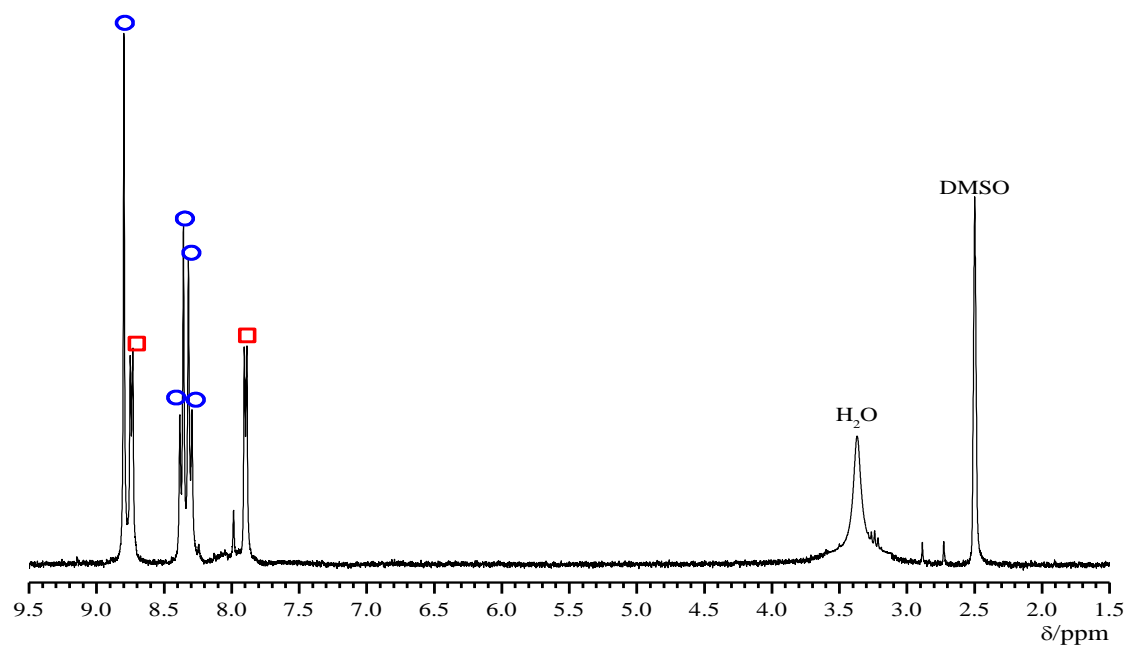

**Figure S15.** <sup>1</sup>H NMR spectra of digested PPF-4. Red squares and blue circles represent signals of BPY and ZnTCPP respectively.

## 2.6 Analysis of PPF-4 synthesized by PPF-1

Powder X-ray diffraction shows full conversion from PPF-1 to PPF-4 and no other products formed (Figure S16). To quantitatively find the occupation of BPY linker in PPF-4, we digested samples of PPF-4 in acid following the same method described above. Analysis of the  $^1\text{H}$  NMR spectra shows 90% occupation of BPY linker in PPF-4 (Figure S17).

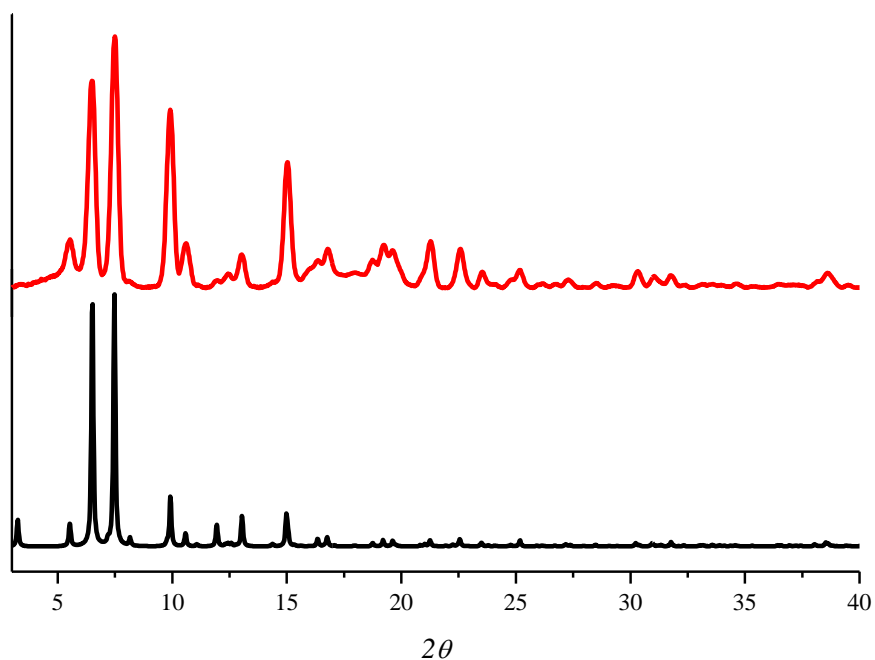

**Figure S16.** The simulated (black) and as synthesized (red) X-ray powder diffraction patterns for PPF-4.

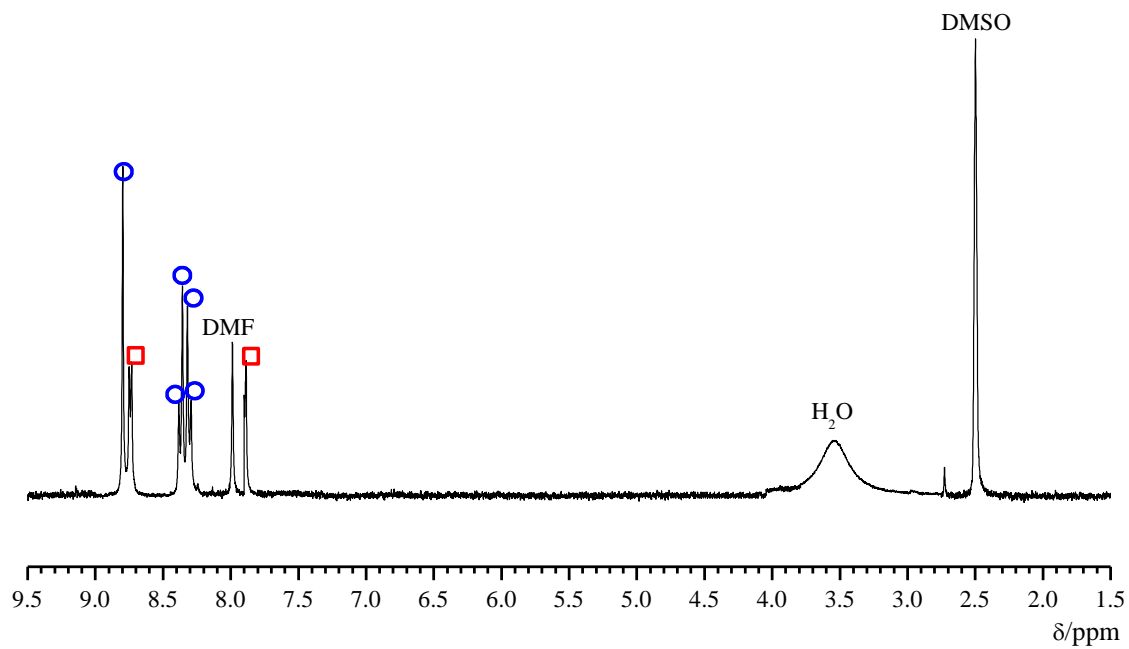

**Figure S17.**  $^1\text{H}$  NMR spectra of digested PPF-4. Red squares and blue circles represent signals of BPY and ZnTCPP respectively.

**Table S1.** Amounts of reactants and resulting structures for the linker insertion investigation of PPFs.

| <b>Starting Structure</b> | <b>Pillar</b> | <b>Pillar Amt.<br/>(equivalents)</b> | <b>Phase(s) identified<sup>a</sup></b> |
|---------------------------|---------------|--------------------------------------|----------------------------------------|
| PPF-1                     | BPY           | 0.8                                  | PPF-1 + PPF-27                         |
| PPF-1                     | BPY           | 1.0                                  | PPF-1 + PPF-27                         |
| PPF-1                     | BPY           | 2.0                                  | PPF-27                                 |
| PPF-1                     | BPY           | 4.0                                  | PPF-27 + PPF-4                         |
| PPF-1                     | BPY           | 5.0                                  | PPF-4                                  |
| PPF-1                     | DPNI          | 1.0                                  | PPF-1 + PPF-18                         |
| PPF-1                     | DPNI          | 2.0                                  | PPF-18                                 |
| PPF-1                     | DPNI          | 5.0                                  | PPF-18                                 |
| PPF-1                     | DPT           | 1.0                                  | PPF-1 + PPF-21                         |
| PPF-1                     | DPT           | 2.0                                  | PPF-21                                 |
| PPF-1                     | DPT           | 5.0                                  | PPF-21                                 |
| PPF-27                    | BPY           | 1.0                                  | PPF-27                                 |
| PPF-27                    | BPY           | 2.0                                  | PPF-27                                 |
| PPF-27                    | BPY           | 4.0                                  | PPF-27 + PPF-4                         |
| PPF-27                    | BPY           | 5.0                                  | PPF-4                                  |
| PPF-18                    | DPNI          | 5.0                                  | PPF-18                                 |
| PPF-21                    | DPT           | 5.0                                  | PPF-21                                 |
| PPF-18                    | BPY           | 2.0                                  | PPF-27                                 |
| PPF-21                    | BPY           | 2.0                                  | PPF-27                                 |

<sup>a</sup> based upon powder XRD pattern analysis

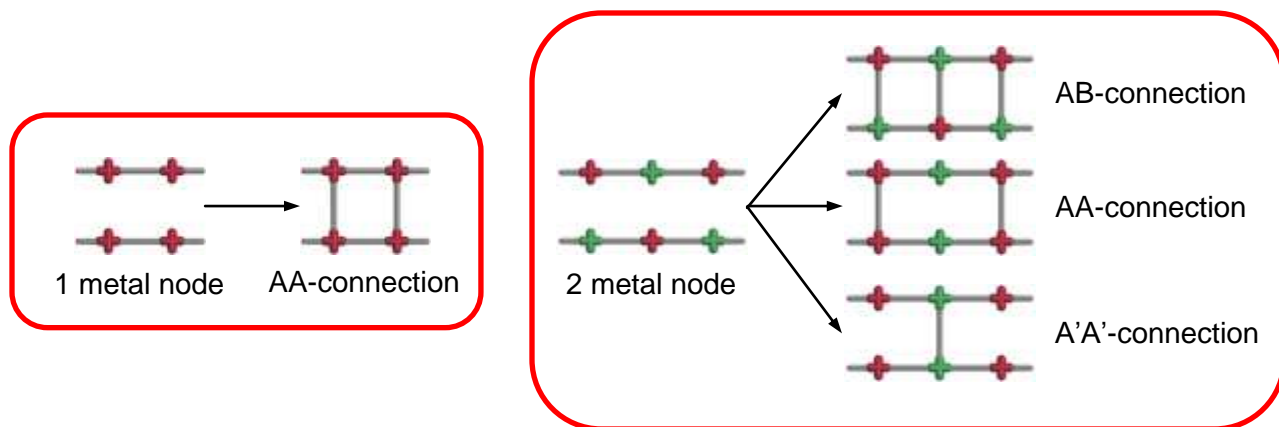

**Figure S18.** The difference in linker insertion connectivity between frameworks with one single metal node and two different metal nodes.

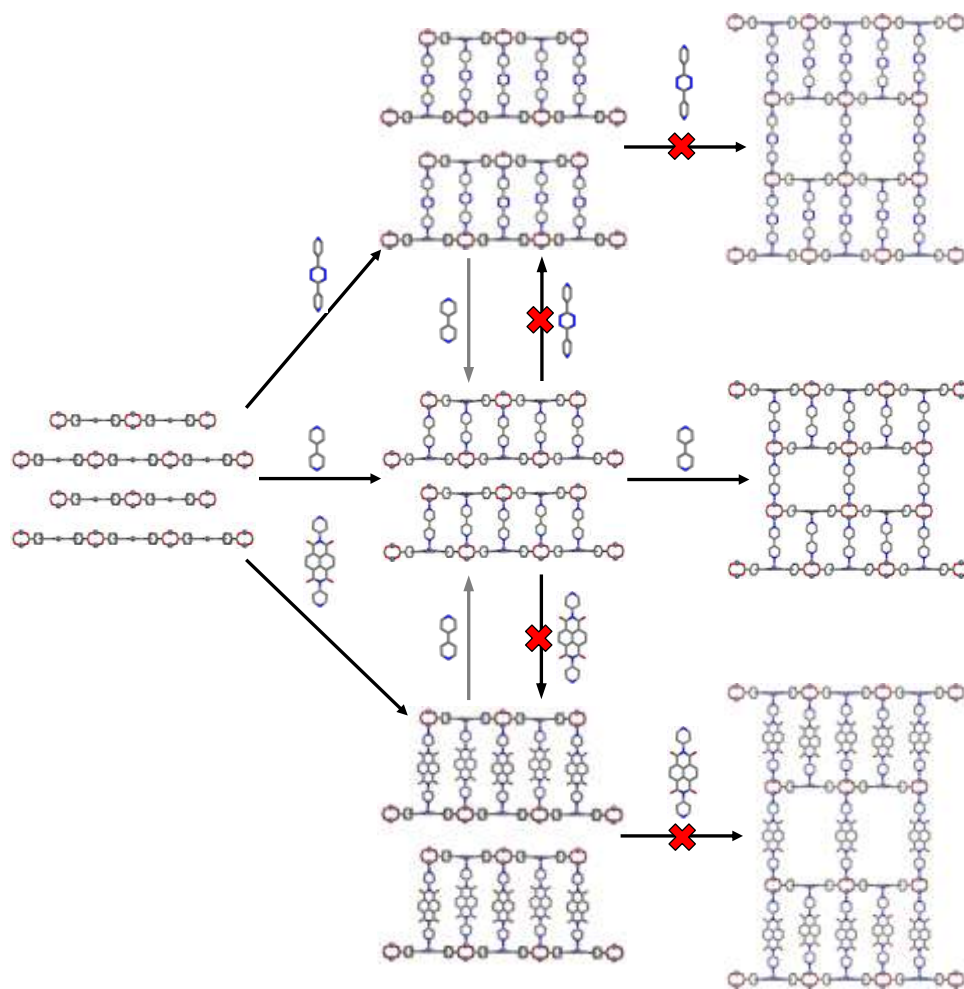

**Figure S19.** Schematic representation of all attempted linker insertion reactions in PPFs. Red crosses denote reactions which were not successful. Grey arrows denote a linker replacement reaction which was previously reported by our group (see ref. 2a).

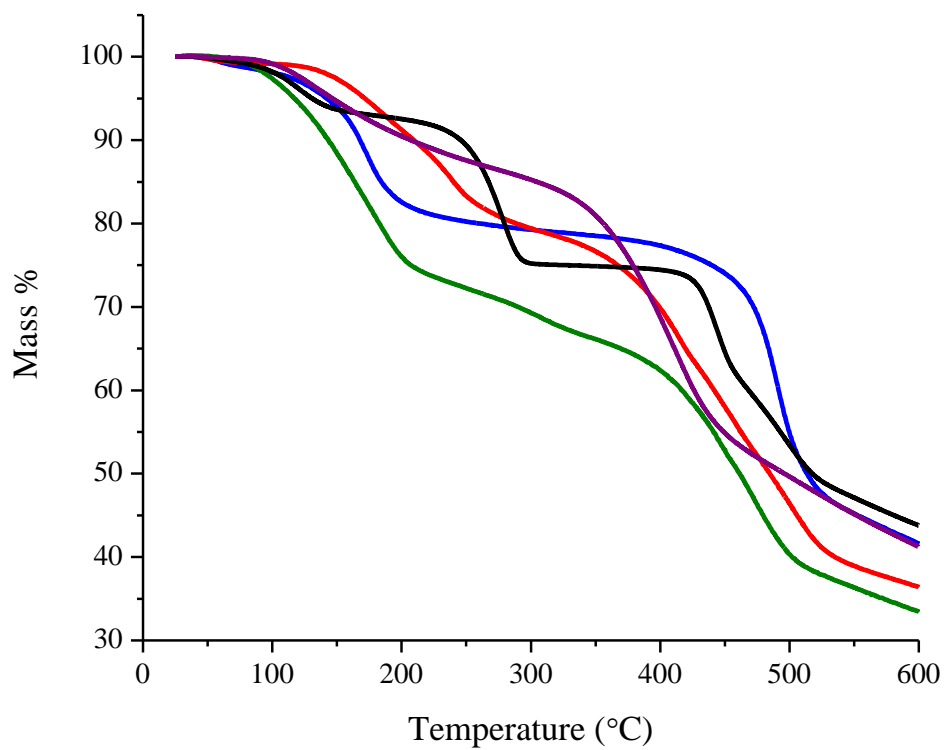

**Figure S20.** TGA data of PPF-1 (black), PPF-27 (red), PPF-18 (blue), PPF-21 (green), and PPF-4 (purple).



## References

- (1) Chung, H.; Barron, P. M.; Novotny, R. W.; Son, H. -T.; Hu, C.; Choe, W. *Cryst. Growth Des.* **2009**, *9*, 3327.
- (2) (a) Burnett, B. J.; Barron, P. M.; Hu, C.; Choe, W. *J. Am. Chem. Soc.* **2011**, *133*, 9984.  
(b) Farha, O. K.; Sultz, A. M.; Sargeant, A. A.; Nguyen, S. T.; Hupp, J. T. *J. Am. Chem. Soc.* **2011**, *133*, 5652.
- (3) <http://www.ccdc.cam.ac.uk/products/mercury/>
- (4) Wang, Z.; Tanabe, K. K.; Cohen, S. M. *Inorg. Chem.* **2009**, *48*, 296.
